# Supplementary material for: CTCF confers local nucleosome resiliency after DNA replication and during mitosis
Source: eLife journal article supplement (doi:10.7554/elife.47898), 2019-10-10

**Figure 1-Figure Supplement 1**

**A**

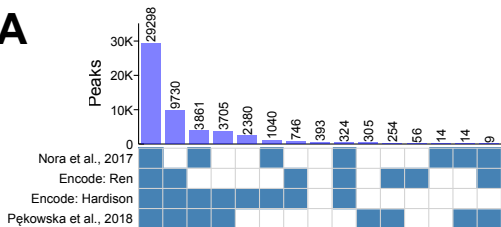

**B**

Spearman Correlation:

$r = 0.505$

Peak height by motif score quintile

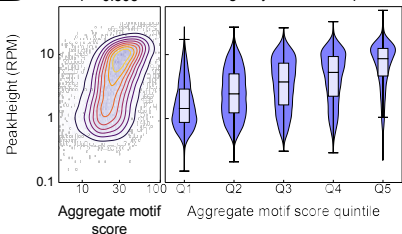

**C**

Interphase ATAC-seq

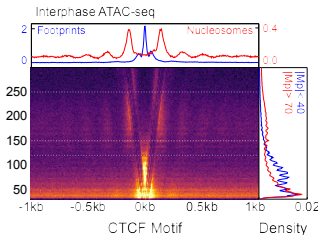

Supplement: supp [file elife-47898-supp-v1.zip]
