# Supplementary material for: CTCF confers local nucleosome resiliency after DNA replication and during mitosis
Source: eLife journal article supplement (doi:10.7554/elife.47898), 2019-10-10

# Figure 5-Figure Supplement 3

**A**

Maximal Motif Score by  
Bookmarking Category

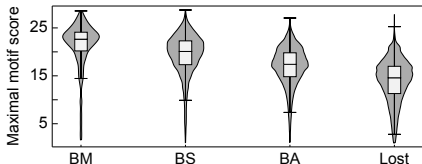**B**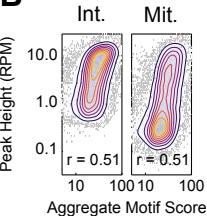**C**

Correlation between  
Motif Score & Peak Height

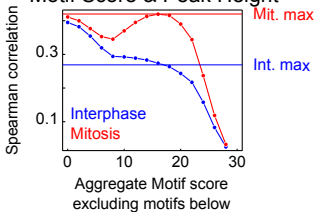

Supplement: supp [file elife-47898-supp-v1.zip]
