# Supplementary material for: CTCF confers local nucleosome resiliency after DNA replication and during mitosis
Source: eLife. 2019 Oct 10;8:e47898. doi: 10.7554/eLife.47898 (PMC6844645; doi:10.7554/eLife.47898)
Supplement: Supplementary file 1. [file elife-47898-supp1.xlsx]

## Sheet: ChipSamples
Overview of ChIP-seq MNase H3 ChIP-seq, MINCE-seq libraries sequenced in this study.
Cell	Chip	AM	SampleName	Rep	Treat	ReadLength	FilteredReads	TotalReads	AlignmentFilterRate
E14Tg2a	Ctcf	A	CTCF_A_PFA_1	1	-	55	20533877	31140143	0.659402
E14Tg2a	Ctcf	A	CTCF_A_PFA_2	2	-	55	22722026	31967036	0.710796
E14Tg2a	Ctcf	A	CTCF_A_FA	3	-	76	26415923	47186754	0.559816
E14Tg2a	Ctcf	M	CTCF_M_PFA_1	1	-	55	27334633	42533170	0.642666
E14Tg2a	Ctcf	M	CTCF_M_PFA_2	2	-	55	17573582	27224746	0.6455
E14Tg2a	Ctcf	M	CTCF_M_FA	3	-	76	14089650	26789504	0.525939
E14Tg2a	Input	A	Input_A_FA_R1	2	-	76	18162717	35747398	0.508085
E14Tg2a	Input	A	Input_A_FA_R2	3	-	76	7351005	27503021	0.26728
E14Tg2a	Input	M	Input_M_FA_R1	2	-	76	22721650	41831676	0.543169
E14Tg2a	Input	M	Input_M_FA_R2	3	-	76	11169161	30712070	0.363673
E14Tg2a	Smc1	A	SMC1_A_PFA_2	1	-	55	13233139	21908533	0.604018
E14Tg2a	Smc1	A	Smc1_A_FA	2	-	76	15392531	30614109	0.502792
E14Tg2a	Smc1	M	SMC1_M_PFA_1	1	-	55	24109902	39873249	0.604664
E14Tg2a	Smc1	M	SMC1_M_PFA_2	2	-	55	17555812	29791066	0.589298
CTCF-aid	Input	A	Input_A_mAux_1	1	mAux	76	30279257	51125268	0.592256
CTCF-aid	Input	M	Input_M_mAux_1	1	mAux	76	33054399	55282421	0.597919
CTCF-aid	Ctcf	A	CTCF_A_mAux_1	1	mAux	76	31943066	50525183	0.632221
CTCF-aid	Ctcf	A	CTCF_A_pAux_1	1	pAux	76	28201077	49645513	0.568049
CTCF-aid	Ctcf	M	CTCF_M_mAux_1	1	mAux	76	34591108	57891511	0.597516
CTCF-aid	Ctcf	M	CTCF_M_pAux_1	1	pAux	76	28196072	49247214	0.572541
CTCF-aid	Ctcf	A	CTCF_A_mAux_2	2	mAux	76	29837299	47380458	0.629739
CTCF-aid	Ctcf	A	CTCF_A_pAux_2	2	pAux	76	22611645	38242806	0.591265
CTCF-aid	Ctcf	M	CTCF_M_mAux_2	2	mAux	76	23428315	39906576	0.587079
CTCF-aid	Ctcf	M	CTCF_M_pAux_2	2	pAux	76	28029681	47549637	0.589483
C2C12	Ctcf	A	C2C12_CTCF_A	1	-	75	45430843	72261381	0.628702
C2C12	Ctcf	M	C2C12_CTCF_M	1	-	75	35475121	61772774	0.574284
C2C12	Input	A	C2C12_Input_A	1	-	75	8406155	39207888	0.2144
C2C12	Input	M	C2C12_Input_M	1	-	75	37430994	64525356	0.580097
NIH3T3	Ctcf	A	NIH3T3_CTCF_A	1	-	75	36473821	59390036	0.61414
NIH3T3	Ctcf	M	NIH3T3_CTCF_M	1	-	75	34055210	63738856	0.534293
NIH3T3	Input	A	NIH3T3_Input_A	1	-	75	33477306	54564388	0.613538
NIH3T3	Input	M	NIH3T3_Input_M	1	-	75	37512791	6333199	5.9232
															ctcf_smc1	Input	A	PFA
															ctcf_smc1	Input	M	PFA
															ctcf_smc1	Input	A	DSGPFA
															ctcf_smc1	Input	M	DSGPFA
															nanog_sox	Nanog	A	DSGPFA	NF_sample7_index5	0.748693
															nanog_sox	Nanog	M	DSGPFA	NF_sample8_index6	0.1827
															nanog_sox	Sox2	A	DSGPFA	NF_sample9_index7	0.604571
															nanog_sox	Sox2	M	DSGPFA	NF_sample10_index12	0.119725
															esrrb_dsg_fa	Esrrb	A	PFA	Esrrb_A_FA_R1	0.0169239
															esrrb_dsg_fa	Esrrb	M	PFA	Esrrb_M_FA_R1	0.0159919
															esrrb_dsg_fa	Esrrb	A	DSGPFA	Esrrb_A_DSG_R1	0.0273919
															esrrb_dsg_fa	Esrrb	M	DSGPFA	Esrrb_M_DSG_R1	0.0125696
															esrrb_dsg_fa	Esrrb	A	PFA	Esrrb_A_FA_R2	0.0135594
															esrrb_dsg_fa	Esrrb	M	PFA	Esrrb_M_FA_R2	0.0163852
															esrrb_dsg_fa	Esrrb	A	DSGPFA	Esrrb_A_DSG_R2	0.0340462
															esrrb_dsg_fa	Esrrb	M	DSGPFA	Esrrb_M_DSG_R2	0.0173554
															esrrb_dsg_fa	Input	A	PFA	Input_A_FA_R1	0.0153577
															esrrb_dsg_fa	Input	M	PFA	Input_M_FA_R1	0.010542
															esrrb_dsg_fa	Input	A	PFA	Input_A_FA_R2	0.00925365
															esrrb_dsg_fa	Input	M	PFA	Input_M_FA_R2	0.0117038
															ctcf_v3	Ctcf	A	PFA	CTCF_A_FA	0.150127
															ctcf_v3	Ctcf	M	PFA	CTCF_M_FA	0.0478042
															ctcf_v3	Ctcf	A	DSGPFA	CTCF_A_DSG	0.0488165
															ctcf_v3	Ctcf	M	DSGPFA	CTCF_M_DSG	0.0174589
															ctcf_v3	Smc1	A	PFA	Smc1_A_FA	0.0294592
															ctcf_v3	Smc1	M	PFA	Smc1_M_FA	0.00908185
															ctcf_v3	Smc1	A	DSGPFA	Smc1_A_DSG	0.0102521
															ctcf_v3	Smc1	M	DSGPFA	Smc1_M_DSG	0.00581307
															ctcf_v3	Esrrb	A	PFA	Esrrb_A_FA	0.0111023
															ctcf_v3	Esrrb	M	PFA	Esrrb_M_FA	0.00702684
															ctcf_v3	Esrrb	A	DSGPFA	Esrrb_A_DSG	0.0190495
															ctcf_v3	Esrrb	M	DSGPFA	Esrrb_M_DSG	0.00879902

## Sheet: MNase_H3_MINCE
Study	Cell	Type	IntMit	SampleName	Label	Rep	Treat	ReadLength	Paired	FilteredReads	TotalReads	AlignmentFilterRate
CTCF-aid	CTCF-aid	MNaseH3	I	CTCFAID_A_mAux_1	A_mAux_1	1	mAux	151	1	28159357	55194026	0.510188
CTCF-aid	CTCF-aid	MNaseH3	I	CTCFAID_A_pAux_1	A_pAux_1	1	pAux	151	1	30166219	60145628	0.501553
CTCF-aid	CTCF-aid	MNaseH3	M	CTCFAID_M_mAux_1	M_mAux_1	1	mAux	151	1	27219800	54211892	0.5021
CTCF-aid	CTCF-aid	MNaseH3	M	CTCFAID_M_pAux_1	M_pAux_1	1	pAux	151	1	26218749	52873744	0.495875
CTCF-aid	CTCF-aid	MNaseH3	I	CTCFAID_A_mAux_2	A_mAux_2	2	mAux	151	1	25743886	52691845	0.488574
CTCF-aid	CTCF-aid	MNaseH3	I	CTCFAID_A_pAux_2	A_pAux_2	2	pAux	151	1	24716939	50900115	0.485597
CTCF-aid	CTCF-aid	MNaseH3	M	CTCFAID_M_mAux_2	M_mAux_2	2	mAux	151	1	27147710	55004969	0.49355
CTCF-aid	CTCF-aid	MNaseH3	M	CTCFAID_M_pAux_2	M_pAux_2	2	pAux	151	1	25354407	53294793	0.475739
MINCE	E14Tg2a	MINCE	-	MINCE_Input_Pulse	Input_Pulse_1	1	-	151	1	58085836	112259499	0.517425
MINCE	E14Tg2a	MINCE	-	MINCE_Input_Chase	Input_Chase_1	1	-	151	1	56060456	108721843	0.515632
MINCE	E14Tg2a	MINCE	-	MINCE_EdU_Pulse	EdU_Pulse_1	1	-	151	1	44871384	105794661	0.424137
MINCE	E14Tg2a	MINCE	-	MINCE_EdU_Chase	EdU_Chase_1	1	-	151	1	53868378	110037749	0.489545
MINCE	E14Tg2a	MINCE	-	Input_EdU_Pulse_2	Input_Pulse_2	2	-	76	1	69183051	111813854	0.618734
MINCE	E14Tg2a	MINCE	-	Input_EdU_Thy_Chase_3	Input_Chase_2	2	-	76	1	70892391	113746241	0.62325
MINCE	E14Tg2a	MINCE	-	EdU_Pulse_5	EdU_Pulse_2	2	-	76	1	63595697	120101890	0.529515
MINCE	E14Tg2a	MINCE	-	EdU_Thy_Chase_6	EdU_Chase_2	2	-	76	1	65467604	128625084	0.50898
