# Supplementary figures and images for: CTCF confers local nucleosome resiliency after DNA replication and during mitosis
Source: eLife journal article supplement (doi:10.7554/elife.47898), 2019-10-10

# Figure 3-Figure Supplement 1

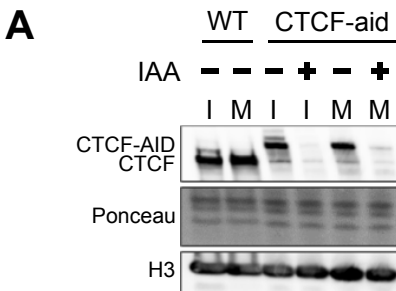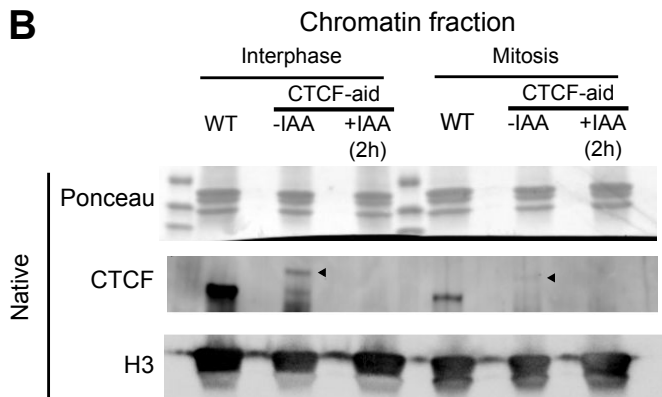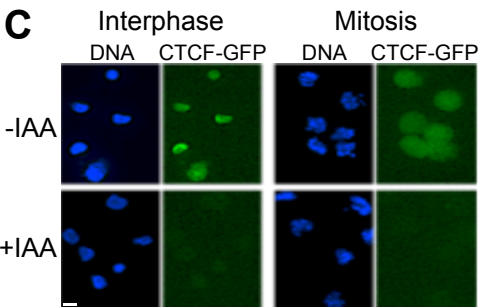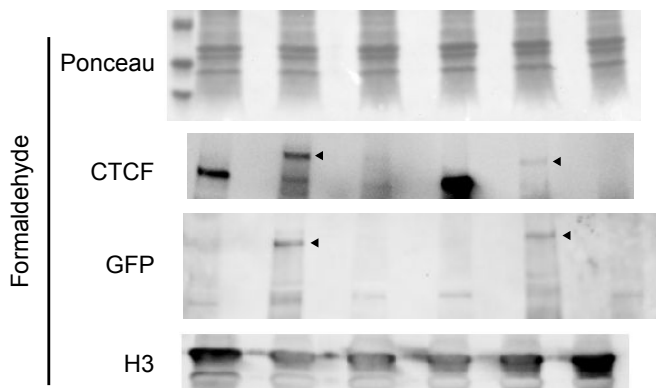

Supplement: supp [file elife-47898-supp-v1.zip]

# Figure 5-Figure Supplement 4

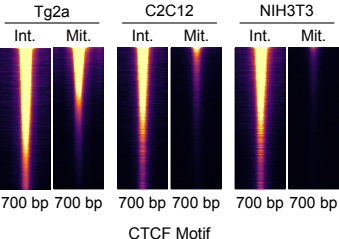

Supplement: supp [file elife-47898-supp-v1.zip]

**Figure 4-Figure Supplement 1**

**A**

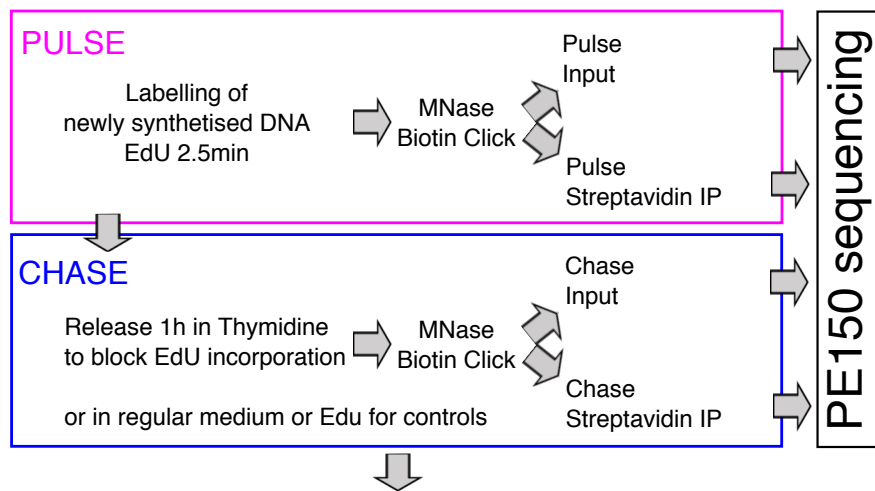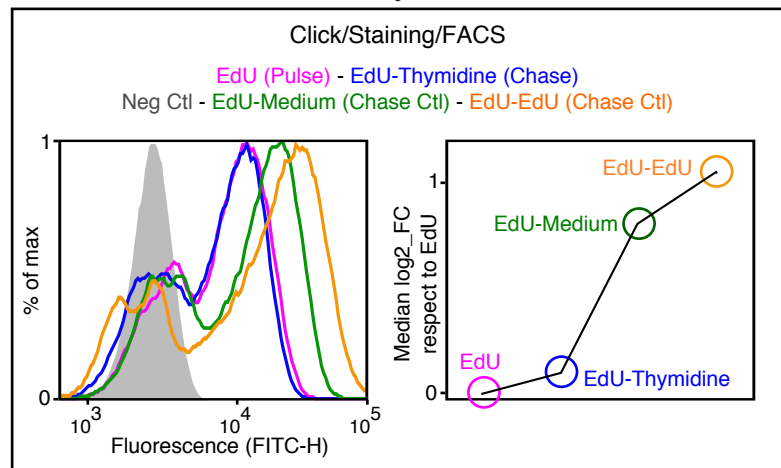

**B**

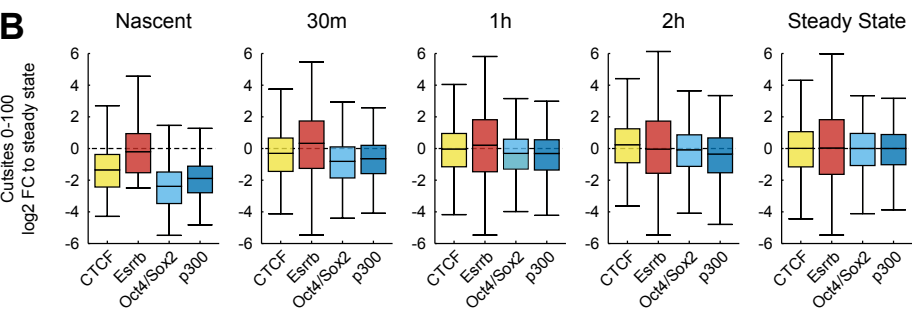

Supplement: supp [file elife-47898-supp-v1.zip]

**Figure 6-Figure Supplement 1**

**A**

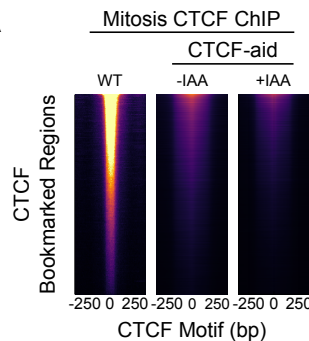

**C**

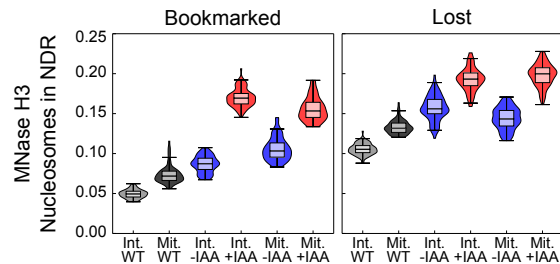

**B**

Bookmarked

Lost

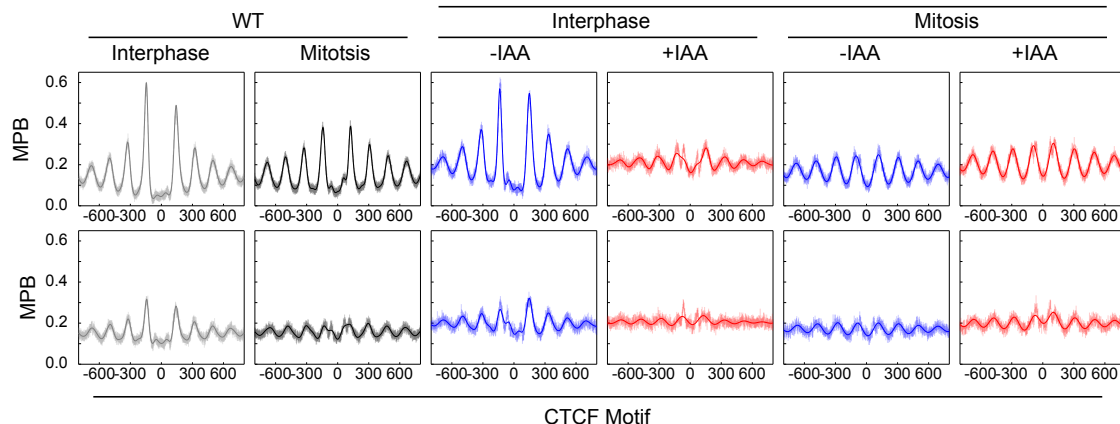

**D**

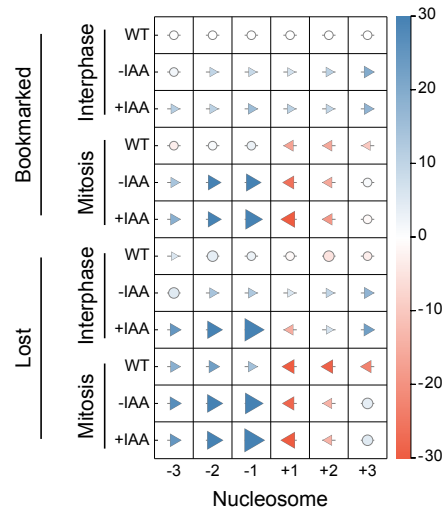

Supplement: supp [file elife-47898-supp-v1.zip]

**Figure 5-Figure Supplement 1**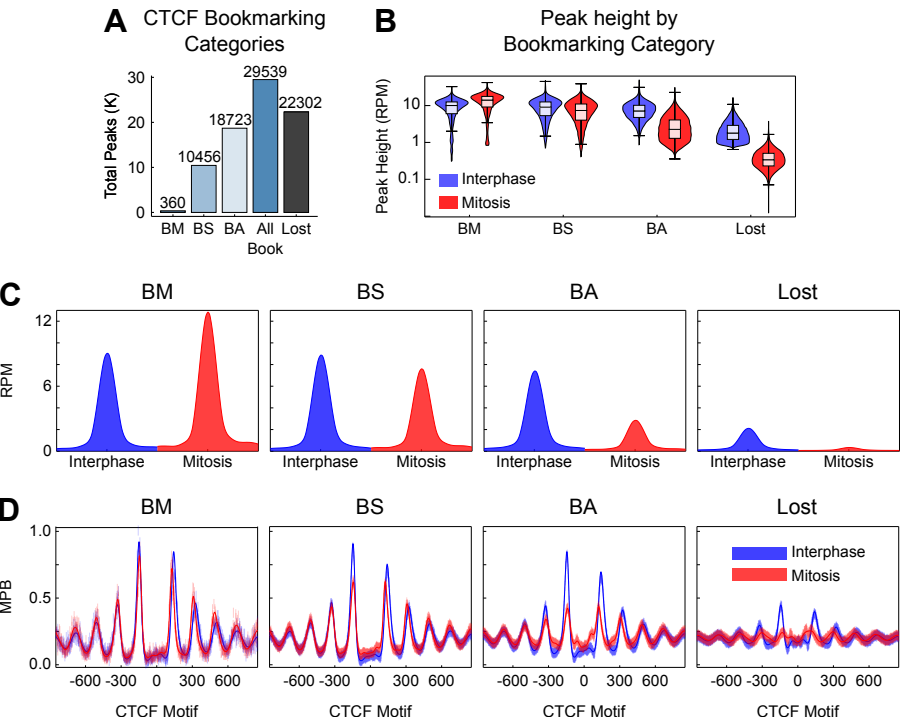

Supplement: supp [file elife-47898-supp-v1.zip]

**Figure 5-Figure Supplement 2**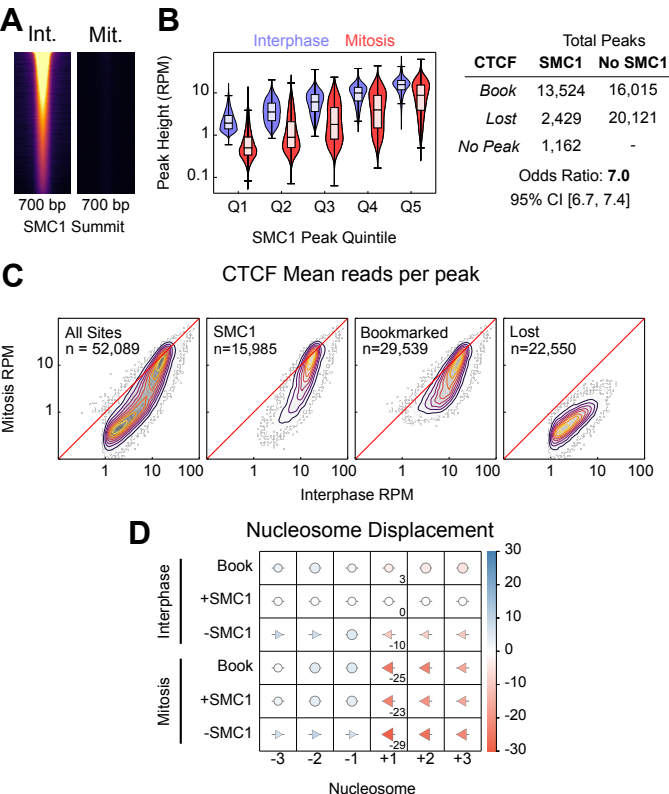

Supplement: supp [file elife-47898-supp-v1.zip]

# Figure 5-Figure Supplement 5

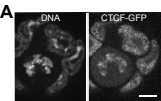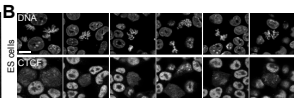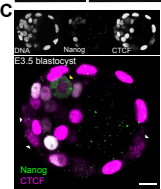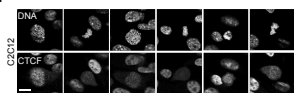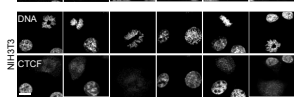

Supplement: supp [file elife-47898-supp-v1.zip]
